# 1 Alcohol preferring P rats exhibit aversion resistant drinking of alcohol 2 adulterated with quinine

3  
4 Nicholas M. Timme<sup>1,\*</sup>, David Linsenbardt<sup>1</sup>, Maureen Timm<sup>2</sup>, Taylor Galbari<sup>1</sup>, Ethan Cornwell<sup>1</sup>, and  
5 Christopher Lapish<sup>1</sup>

6  
7 1. Indiana University – Purdue University Indianapolis

8 2. University of Utah

9 \*: Corresponding Author ([nicholas.m.timme@gmail.com](mailto:nicholas.m.timme@gmail.com))

10

## 11 Abstract

12 Understanding why some people continue to drink alcohol despite negative consequences and others do  
13 not is a central problem in the study of alcohol use disorder (AUD). In this study, we used alcohol preferring  
14 P rats (a strain bred to prefer to drink alcohol, a model for genetic risk for AUD) and Wistars (control) to  
15 examine drinking despite negative consequences in the form of an aversive bitter taste stimuli produced  
16 by quinine. Animals were trained to consume 10% ethanol in a simple Pavlovian conditioning task that  
17 paired alcohol access with an auditory stimulus. When the alcohol was adulterated with quinine (0.1 g/L),  
18 P rats continued to consume alcohol+quinine at the same rate as unadulterated alcohol, despite a  
19 demonstrated aversion to quinine adulterated alcohol when given a choice between adulterated and  
20 unadulterated alcohol in the home cage. Conversely, Wistars decreased consumption of quinine  
21 adulterated alcohol in the task, but continued to try the alcohol+quinine solution at similar rates to  
22 unadulterated alcohol. These results indicate that following about 8 weeks of alcohol consumption P rats  
23 exhibit aversion resistant drinking. This model could be used in future work to explore how biological basis  
24 of alcohol consumption and genetic risk for excessive drinking lead to drinking that is resistant to  
25 devaluation.

26

## 27 Introduction

28

29 Drinking in spite of the negative consequences characterizes advanced stages of an alcohol use disorder  
30 (AUD) (Sanchis-Segura & Spanagel, 2006). At this stage of an AUD, drinking can become inflexible to the  
31 point where the individual is unable to abstain in spite of negative social, legal, and health consequences.  
32 This stage of drinking is typically referred to as compulsive or aversion-resistant drinking (Hopf, Chang,  
33 Sparta, Bowers, & Bonci, 2010; Hopf & Lesscher, 2014) and is of particular concern because treatments  
34 that incorporate aversive stimuli (e.g., disulfiram) may be substantially less effective at this stage of the  
35 disorder. Genetic and environmental factors strongly influence the progression of this disorder from social  
36 to problem drinking (Edenberg & Foroud, 2013; Enoch, 2013; Field & Cox, 2008; Kreuzsch, Vilenne, &  
37 Quertemont, 2013; Wiers et al., 2014). The goal of the current study was to assess the impact of genetic  
38 risk on a specific form of aversion resistant drinking (quinine resistant drinking) in a rodent model of  
39 genetic risk (alcohol preferring P rats) and a control rodent strain (Wistars) during a simple task with  
40 alcohol-paired stimuli.

41

42 It is believe that a large component of risk for an AUD is genetic and human work has clearly outlined  
43 several genetic factors that are associated with the risk for an AUD (Edenberg & Foroud, 2013; Enoch,  
44 2013). Selective breeding procedures have provided an effective way to assess the heritable aspects of  
45 AUDs and provide clear support for the role of genetics in the transmission of excessive drinking  
46 phenotype from parents to progeny. Several rodent lines are available that have been selected on  
47 different features of alcohol preference. The alcohol preferring (P) rat is line that has been selected for  
48 home cage ethanol drinking (Bell, Rodd, Lumeng, Murphy, & McBride, 2006; McBride, Rodd, Bell, Lumeng,  
49 & Li, 2014). This line is used extensively as a rodent model of AUD as they meet several criteria for a rodent  
50 model of AUD. Furthermore, they also exhibit alterations in cognitive behaviors that model some aspects  
51 of the human condition (Beckwith & Czachowski, 2014, 2016; Linsenbardt, Smoker, Janetsian-Fritz, &  
52 Lapish, 2016). These changes in behavior are likely mediated by numerous biological and physiological  
53 abnormalities observed in these animals (Engleman, Ingraham, McBride, Lumeng, & Murphy, 2006; Gilpin,  
54 Stewart, & Badia-Elder, 2008; Zhou et al., 2013). In the current study, we have chosen to use the P rat due  
55 to its high drinking phenotype and genetic load for excessive drinking.

56  
57 In addition to genetic risk, experiences with and environment exposure to alcohol-paired stimuli have also  
58 been shown to play a key role in AUD. Stimuli associated with alcohol acquire incentive motivational  
59 properties that are capable of inducing craving and alcohol seeking behaviors (Field & Cox, 2008; Kreusch  
60 et al., 2013; Wiers et al., 2014). Therefore, in this study we chose to use a Pavlovian conditioning task to  
61 administer alcohol following alcohol-paired auditory stimuli (Linsenbardt & Lapish, 2015; Linsenbardt,  
62 Timme, & Lapish, 2018; McCane, Czachowski, & Lapish, 2014). By training animals to consume alcohol in  
63 this task, we were able to examine task acquisition and performance in a model of genetic risk (P rats) and  
64 controls (Wistars).

65 After training in this task, quinine (a bitter tasting, aversive substance) was added to the alcohol and  
66 drinking was assessed across both populations of animals. Continued drinking despite the presence of  
67 quinine has been used previously as an assessment of aversion-resistant drinking (Hopf et al., 2010).  
68 Wistars (control) showed a substantial decrease in consumption upon quinine adulteration during the  
69 task, while P rats (model for genetic risk) did not. This was despite that fact that the same P rats preferred  
70 non-quinine adulterate alcohol over quinine adulterated alcohol in their home cage. Furthermore, Wistars  
71 continued to try the quinine adulterated alcohol throughout the test session, but their overall  
72 consumption significantly decreased. These results indicate that the Wistar rats maintained flexible  
73 control over drinking, despite their continued motivation to drink, whereas P rats did not.

74

## 75 Methods

### 76 Animals

77 This study utilized 12 male alcohol preferring (P) rats supplied by Indiana University School of Medicine  
78 and 12 male Wistar rats (Envigo, Indianapolis). All animals were born between November 22-26, 2017.  
79 Both sets of animals were shipped via ground transportation from breeding facilities to the laboratory, all  
80 within the city of Indianapolis. All animal procedures were approved by the Indiana University Animal Care  
81 and Use Committee.

82

### 83 Intermittent Access Protocol

84 An intermittent access protocol (IAP) was used to acclimate animals to the taste and effects of alcohol  
85 (Linsenhardt & Lapish, 2015; Simms et al., 2008). Free access to 20% ethanol in one bottle and tap water  
86 in another bottle was provided in the animals' home cages for 24 hour periods on alternating days.  
87 Animals were weighed and bottles were placed on the cages on Monday, Wednesday, and Friday  
88 mornings (approximately 2 hours into the animals' dark cycle) for 4 weeks. Bottles were pulled 24 hours  
89 later and weighed to assess consumption.

90

### 91 Auditory 2CAP Task

92 All training and testing was conducted in standard rat shuttle boxes (Med Associates) which were housed  
93 in custom sound attenuating chambers. One retractable sipper and one speaker were located on both  
94 ends of the chamber. Only 10% ethanol solution was used throughout all training and testing in the 2CAP.  
95 An open guillotine door separated the two sides of the chamber. The chamber was illuminated by house  
96 lights located behind the chamber. Licks were recorded using electrical contacts between the sipper and  
97 the metal grid floor. Infrared photo beams were used to record the animal's position in the chamber.  
98 Testing software was implemented in Med Associates (see Supplemental for software). A similar visual  
99 2CAP task has been described previously (Linsenhardt & Lapish, 2015; Linsenhardt et al., 2018; McCane  
100 et al., 2014).

101

102 During the first three days of regular 2CAP task training, a short task was conducted to acclimate the  
103 animals to the operant chambers and motorized sippers prior to the 2CAP task. At the start of the  
104 acclimation task, the house lights would turn on and both sippers would be inserted into the chamber.  
105 After 20 seconds, the sippers would withdraw for 2 seconds and then be reinserted into the chamber. If,  
106 at any point, the animal reached 15 licks on a sipper, that sipper would withdraw and not re-enter the  
107 chamber. Once the lick limits had been reached on both sippers, the house lights would turn off and the  
108 acclimation session would be complete. If the lick limit on both sippers was not reached in 6 minutes, the  
109 lights would turn off, the sippers would withdraw, and the acclimation session would be complete.

110

111 All 2CAP training and testing sessions consisted of 60 trials with the house lights on. Each trial was one of  
112 three types: stay, go, or null. Stay trials were those in which the sipper would be inserted on the same  
113 side of the chamber as the animal. Go trials were those in which the sipper would be inserted on the  
114 opposite side of the chamber as the animal. Null trials were those in which the sipper would not be  
115 inserted.

116

117 The sequence of events in a trial are shown in Figure 1 A. A trial began with a 2 second attention tone of  
118 8 kHz. Following the attention tone, a trial type tone (4, 8, or 12 kHz) was played to direct the animal to  
119 the correct access location. All null trials were associated with the 8 kHz tone, while the 4 and 12 kHz  
120 tones were associated with stay and go trials in a counterbalanced fashion. Following the direction tone,  
121 both sippers were inserted into the chamber half-way. The correct sipper continued into the chamber,  
122 while the incorrect sipper (or both sippers in the case of a null trial) was withdrawn. Both sippers were  
123 initially inserted to prevent animals from relying on sipper sounds to locate access.

124

125 Following sipper insertion, animals were given 5.5 seconds of access to the alcohol solution. However, if  
126 the animal did not approach the sipper (i.e., break the photo beam in front of the sipper), the sipper was

127 withdrawn after 2 seconds of access to prevent moving over to the opposite sipper (e.g. correcting). After  
128 the access period, the direction tone was turned off, the correct sipper withdrew (in the case of non-null  
129 trials where it was approached), and an inter-trial interval with no stimuli was applied prior to the next  
130 trial. The inter-trial interval period was chosen pseudorandomly from 23, 29, 31, 37, 41, 43, 47, and 53  
131 seconds. Also, a 3 second buffer delay was used at the start and end of each trial.

132  
133 To prevent animals from perseverating on stay or go trials, force trials were imposed such that if an animal  
134 drank on only one type of trial for three trials in a row, subsequent trials of the opposite type would be  
135 imposed until the animal drank on the other type of trial. For instance, if an animal drank on three stay  
136 trials in a row, it would receive go trials in place of any subsequent stay trials until it drank.

137  
138 Training sessions were conducted once a day during the animals' dark cycle on week days (Figure 1 B). On  
139 training days 1-3, the animals performed the acclimation task immediately before the 2CAP task with no  
140 null trials (30 stay and 30 go trials). For days 4-16 of 2CAP training, the acclimation task was not performed  
141 and the 2CAP task contained no null trials. From the 17<sup>th</sup> day of 2CAP training onwards (including quinine  
142 and reversal testing), the animals received 20 stay, 20 go, and 20 null trials.

143

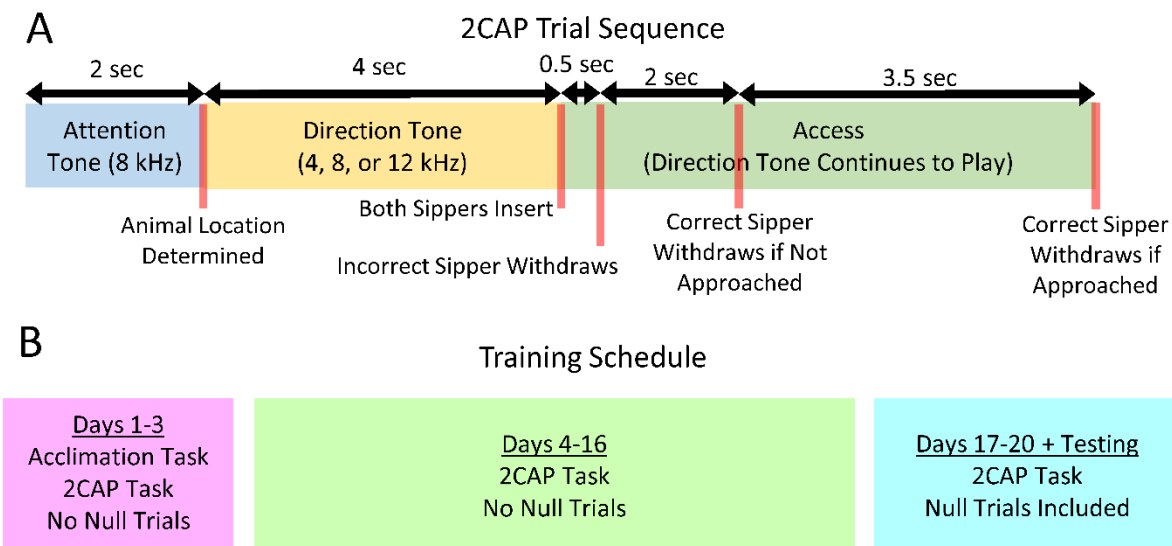

144  
145 **Figure 1: 2CAP trial sequence and training schedule. (A)** 2CAP trial sequence. A 8 kHz attention tone was  
146 played for 2 seconds, followed by a 4 second direction tone. Next, both sippers were inserted and 0.5  
147 seconds later (half the total time of complete sipper insertion), the incorrect sipper was withdrawn (or  
148 both sippers were withdrawn in null trials). If the animal did not approach the correct sipper after 2 more  
149 seconds, it was withdrawn to prevent correcting. If the animal approached the correct sipper, it was  
150 withdrawn after a total of 5.5 seconds of access. **(B)** Training schedule. Days 1-3: The acclimation task was  
151 performed immediately before the 2CAP task with no null trials. Days 4-16: The 2CAP task was performed  
152 with no null trials. Days 17-20 and Testing (quinine and reversal): The 2CAP task was performed with null  
153 trials.

154

## 155 Quinine Testing

156 The 10% alcohol solution was adulterated with 0.1 g/L quinine in a regular 2CAP session to assess aversion  
157 resistant drinking. This testing session immediately followed (1 day later) a regular 2CAP session with no  
158 quinine, which served as a baseline measurement of the animal's behavior in the 2CAP task.

159

## 160 3-Bottle Choice Testing

161 A 3-bottle choice test was conducted in the animals' home cages to ensure that P rats found the 0.1 g/L  
162 dose of quinine aversive. Each animal was given 3 days of continuous access to 2 bottles with 10% ethanol  
163 and 1 bottle with tap water. Consumption was measured once a day by weighing bottles. Following the 3  
164 days of baseline testing, the alcohol bottle that was preferred by the animals over the course of all 3 days  
165 was adulterated with 0.1 g/L quinine. The preference for the quinine adulterated bottle was then  
166 measured after 24 hours of access. In both cases, preference was simply calculated as the ratio of alcohol  
167 consumed in 1 bottle to the total alcohol consumed from both bottles.

168

## 169 Reversal Testing

170 To assess the degree to which animals were using the directional tones to locate ethanol access, a tone  
171 reversal test was conducted. During this test, the relationship in tone frequency between stay and go  
172 tones was reversed. For instance, animals that had learned to associate 4 kHz with go and 12 kHz with  
173 stay were instead presented with 12 kHz as the go signal and 4 kHz as the stay signal. All other features of  
174 the task were maintained. This testing session immediately followed (1 day later) a regular 2CAP session  
175 with the standard trial type/tone frequency relationship that the animal had learned. This previous day  
176 served as a baseline measurement of the animal's behavior in the 2CAP task.

177

## 178 Free Access

179 Near the end of testing, animals were given a free access session in which the sippers were inserted  
180 throughout the entire time of the 2CAP session. No tones were played and the house lights were on. This  
181 test was conducted to assess the animals' motivation to drink 10% ethanol during the regular 2CAP  
182 session.

183

## 184 Blood Ethanol Concentration (BEC) Measurements

185 Blood samples were taken from the tip of the tail to measure blood ethanol concentration (BEC)  
186 immediately after the free access session and another regular 2CAP session. Blood samples were  
187 centrifuged, blood plasma was collected and stored at -80 until analysis. Blood plasma was thawed and  
188 then run through an alcohol analyzer (Analox) to determine BEC of the blood sample.

189

## 190 Training and Testing Schedule

191 All animals were 85 to 89 days old at the start of IAP. Animals were divided into two cohorts following IAP  
192 (4 Wistars and 4 P rats in each cohort). The first cohort entered training immediately after IAP (age: 122  
193 days). The second cohort entered training after a delay of several weeks (age: 155 to 159 days). Testing  
194 occurred in a set order of quinine, reversal, 3-bottle choice, free access, and regular 2CAP BEC check.  
195 Some animals proceeded to testing immediately following training. Other animals were delayed to  
196 simulate the schedule following surgery.

197

198 Statistics, Data, and Software

199 Statistical testing (ANVOA) and linear regression fits were performed in MATLAB and are shown in the  
200 supplemental code. All data is freely available as supplemental material, along with MATLAB code used in  
201 the analysis and the Med Associates software used to run the 2CAP task and tests.

202

## 203 Results

### 204 Intermittent Access Protocol

205 An intermittent access protocol (IAP) was used to acclimate animals to the taste of alcohol (Figure 2 A and  
206 B). This procedure involved 24-hour access periods to 20% ethanol and water on alternating days (M, W,  
207 F) for 4 weeks. Alcohol intake increased throughout IAP (main effect of IAP session,  $F(11,242) = 15.821$ ,  $p$   
208  $< 10^{-6}$ ). Also, P rats consumed more alcohol than Wistars (main effect of strain,  $F(1,22) = 78.537$ ,  $p < 10^{-6}$ ).  
209 Finally, the interaction between strain and IAP session was found to be significant ( $F(11,242) = 5.18$ ,  $p <$   
210  $10^{-6}$ ), indicating that the escalation in drinking through IAP was different between P rats and Wistars.

211

212 Following IAP, 8 P rats and 8 Wistars were selected for training in the 2CAP task (Figure 2 C). Data for all  
213 of these animals is presented throughout the remainder of the analysis. The choice of 8 P rats and 8  
214 Wistars was made based on available training chambers for 2CAP and the desire to maintain balanced  
215 numbers of P rats and Wistars. The highest drinking Wistars and lowest drinking P rats throughout IAP  
216 were selected to bring strain mean intake closer together. One Wistar with very low intake was selected  
217 for training prior to the discovery leaks in the IAP intake data. These leak data points have been manually  
218 corrected in these analyses (see analysis code).

219

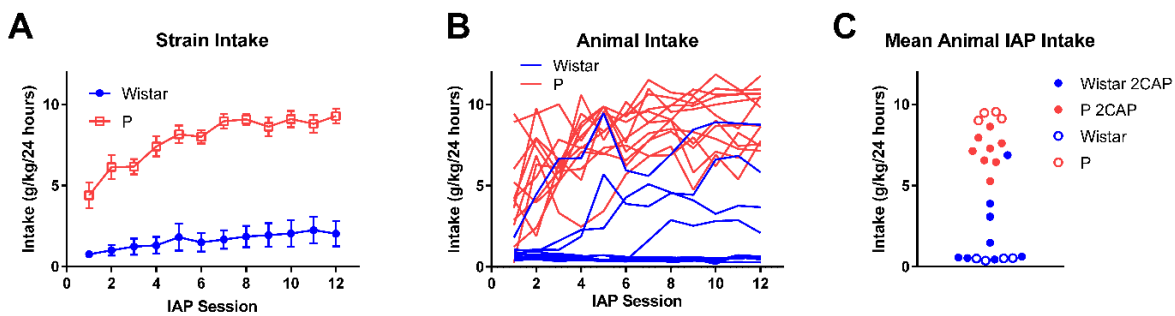

220

221 **Figure 2: Intermittent access protocol (IAP) consumption.** (A) As populations, both P rats and Wistars  
222 increased consumption throughout IAP (Mean +/- SEM). (B) Individual consumption values throughout  
223 IAP for all animals. (C) 8 P rats and 8 Wistars were selected for 2CAP training (filled circles).

224

### 225 2CAP Training

226 A simple, limited access session was used to acclimate animals to the training chamber, to the sippers,  
227 and to the reinforcer during the first 3 days of 2CAP training. During this session, animals were given  
228 access to 15 licks of 10% ethanol on either side of the operant chamber. They had a maximum time limit  
229 of 6 minutes to complete this acclimation session (i.e., reach the lick limit on both sippers). At the end of  
230 the acclimation session, a regular 2CAP training session began (see below).

231



232 Over the 3 acclimation sessions, time to completion decreased in each group, though P rats completed  
233 the task faster (Figure 3 A) (main effect of day:  $F(2,28) = 35.573$ ,  $p < 10^{-6}$ , main effect of strain:  $F(1,14) =$   
234  $7.174$ ,  $p = 0.018$ , interaction:  $F(2,28) = 2.634$ ,  $p = 0.089$ ). Also, both P rats and Wistars performed their  
235 first lick in progressively shorter times (Figure 3 B) (main effect of day:  $F(2,28) = 10.716$ ,  $p < 10^{-3}$ , main  
236 effect of strain:  $F(1,14) = 1.743$ ,  $p = 0.21$ , interaction:  $F(2,28) = 1.67$ ,  $p = 0.21$ ). Finally, both P rats and  
237 Wistars increased their number of licks over the 3 acclimation sessions (Figure 3 C) (main effect of day:  
238  $F(2,28) = 13.528$ ,  $p < 10^{-4}$ , main effect of strain:  $F(1,14) = 3.003$ ,  $p = 0.11$ , interaction:  $F(2,28) = 0.759$ ,  $p =$   
239  $0.48$ ). Note that some animals were able to obtain more than 30 total licks because they continued to lick  
240 as the sipper was being withdrawn. Importantly, these data provide evidence that all subjects were  
241 acclimated to the chamber and were willing to drink at least small amounts of 10% ethanol solution.  
242

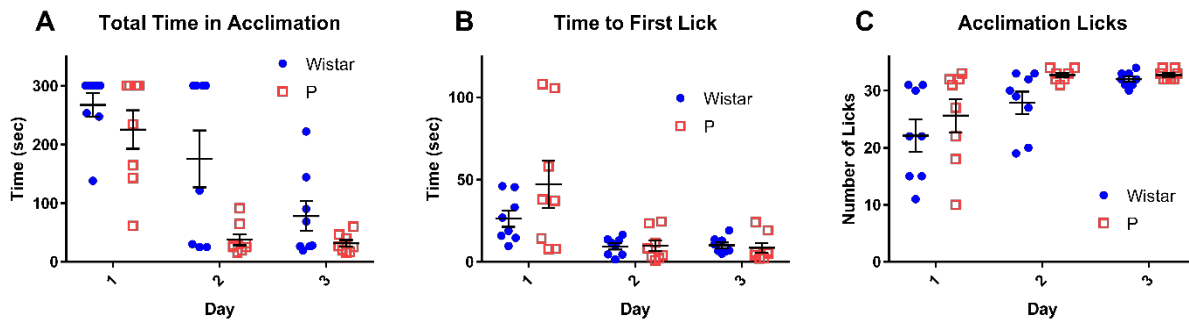

243 **Figure 3: Animals increased licking and lick speed throughout 2CAP acclimation procedure.** On the first  
244 three days of 2CAP training, animals were acclimated to the test chamber, the sippers, and the reinforcer  
245 with up to five minutes of exploration time and 30 total licks, whichever came first. Time required to  
246 complete the acclimation task (A) and the time to first lick (B) decreased over successive acclimation days.  
247 (C) The number of licks increased throughout acclimation. The sippers withdrew at 30 licks, but animals  
248 were frequently able to perform additional licks during sipper withdrawal.  
249

250  
251 As expected, numerous changes were observed in task performance throughout 2CAP training (Figure 4).  
252 During the first 16 days of training, no null trials were included to facilitate task acquisition. Both P rats  
253 and Wistars increased alcohol consumption throughout training (Figure 4 A), though P rats reached higher  
254 overall consumption levels (main effect of day:  $F(15,210) = 8.24$ ,  $p < 10^{-6}$ , main effect of strain:  $F(1,14) =$   
255  $27.65$ ,  $p = 0.0001$ , interaction:  $F(15,210) = 1.53$ ,  $p = 0.096$ ). Both P rats and Wistars increased number of  
256 drinking trials throughout training (Figure 4 B), though P rats had more drinking trials (main effect of day:  
257  $F(15,210) = 5.15$ ,  $p < 10^{-6}$ , main effect of strain:  $F(1,14) = 9.17$ ,  $p = 0.009$ , interaction:  $F(15,210) = 0.82$ ,  $p =$   
258  $0.65$ ). Both P rats and Wistars decreased the time it took them to drink following sipper insertion (latency  
259 to drink) throughout training (Figure 4 C), though P rats exhibited faster and more consistent latencies  
260 (one Wistar had no drink trials on the first day which prevented a meaningful latency calculation, main  
261 effect of day:  $F(15,195) = 9.12$ ,  $p < 10^{-6}$ , main effect of strain:  $F(1,13) = 9.24$ ,  $p = 0.009$ , interaction:  
262  $F(15,195) = 1.88$ ,  $p = 0.027$ ). Interestingly, both P rats and Wistars increased the proportion of trials where  
263 they approached a sipper following the CS in early stages of training (Figure 4 D), the P rats continued to  
264 increase to the point where they approached on nearly all trials (main effect of day:  $F(15,210) = 7.63$ ,  $p <$   
265  $10^{-6}$ , main effect of strain:  $F(1,14) = 17.46$ ,  $p = 0.0009$ , interaction:  $F(15,210) = 1.30$ ,  $p = 0.20$ ).  
266

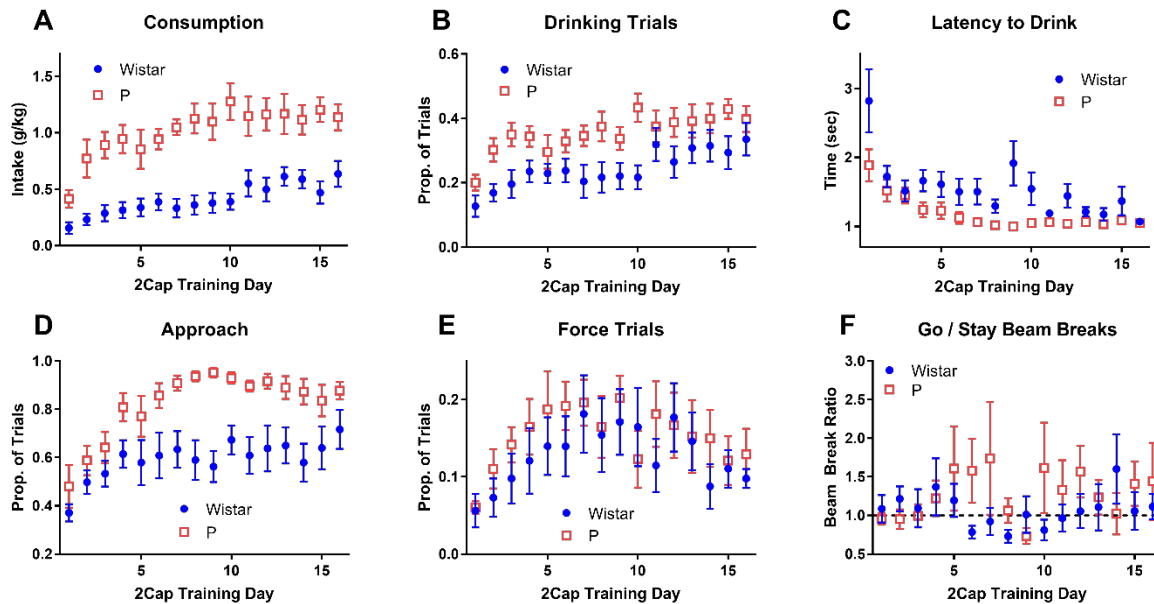

267  
268 **Figure 4: 2CAP training prior to null trials.** Both P rats and Wistars increased alcohol intake (A) and the  
269 proportion of trials where the animal drank (B), though P rats did so to larger degrees. (C) Latency to first  
270 lick following sipper insertion decreased throughout training. (D) Both P rats and Wistars increased the  
271 proportion of trials where they approached a sipper, but P rats eventually approached on nearly all trials.  
272 (E) The number of force trials first increased and then decreased throughout training. (F) Both P rats and  
273 Wistars did not move more on go trials in relation to stay trials.

274  
275 To ensure that animals would not simply stay near one sipper to obtain access on half the trials, force  
276 trials were added such that after three drink trials of one type (stay or go), only trials of the opposite type  
277 would appear until the animal drank. The presence of these force trials produced an interesting effect in  
278 animal task performance (Figure 4 E). Both P rats and Wistars received increasing numbers of force trials  
279 early in training, but then both strains exhibited a decrease in force trials (main effect of day:  $F(15,210) =$   
280  $2.12, p = 0.01$ , main effect of strain:  $F(1,14) = 1.43, p = 0.25$ , interaction:  $F(15,210) = 0.35, p = 0.99$ ). These  
281 data indicate that animals initially adopted a strategy wherein they stayed near one sipper and ignored  
282 the CS, but that their strategy changed as they learned the CS relationship.

283  
284 To assess the animals' use of the CS, the ratio of beam break rates during the go and stay trials was  
285 calculated (Figure 4 F). These data were highly variable and exhibited no clear differences between strain  
286 or training day (one P rat had a day with no beam breaks on stay trials which prevented a meaningful ratio  
287 calculation, main effect of day:  $F(15,195) = 0.71, p = 0.77$ , main effect of strain:  $F(1,13) = 0.78, p = 0.39$ ,  
288 interaction:  $F(15,195) = 1.05, p = 0.40$ ). Furthermore, these data were not consistent above 1, indicating  
289 that animals did not move more on go trials relative to stay trial (one sample t-test (comparison mean =  
290 1) for each strain and day produced only 3 out of 32 tests with  $p < 0.05$ ). These data seem to contradict  
291 the force trial data (Figure 4 E) because the animals do not exhibit increased movement for go trials as  
292 would be expected if they were utilizing the CS to direct their movement.

293



294 After 16 days of regular 2CAP training, null trials were added to the task by replacing 10 go and 10 stay  
295 trials with 20 null trials (Figure 5). Null trials had identical structure to go and stay trials with the directional  
296 tone (4 or 12 kHz) replaced by the attention tone (8 kHz). Both strains' drink trials tended to be about  
297 two-thirds stay trials and one-third go trials prior to the introduction of null trials (Figure 5 A), but the  
298 addition of null trials changed this pattern such that all animals drank roughly equally on stay and go trials  
299 (main effect of day:  $F(5,70) = 16.90$ ,  $p < 10^{-6}$ , main effect of strain:  $F(1,14) = 0.03$ ,  $p = 0.86$ , interaction:  
300  $F(5,70) = 1.55$ ,  $p = 0.19$ ). Conversely, the addition of null trials did not change the relationship between  
301 movement on stay and go trials for either strain (Figure 5 B) (main effect of day:  $F(5,70) = 0.33$ ,  $p = 0.89$ ,  
302 main effect of strain:  $F(1,14) = 0.42$ ,  $p = 0.53$ , interaction:  $F(5,70) = 0.92$ ,  $p = 0.48$ ). Finally, both P rats and  
303 Wistars moved more during null trials than go and stay trials (Figure 5 C) (main effect of day:  $F(3,42) =$   
304  $0.16$ ,  $p = 0.93$ , main effect of strain:  $F(1,14) = 0.73$ ,  $p = 0.41$ , interaction:  $F(3,42) = 0.95$ ,  $p = 0.42$ , one  
305 sample t-test (comparison mean = 0.5) for each strain and day produced 5 out of 8 tests with  $p < 0.05$ ).  
306

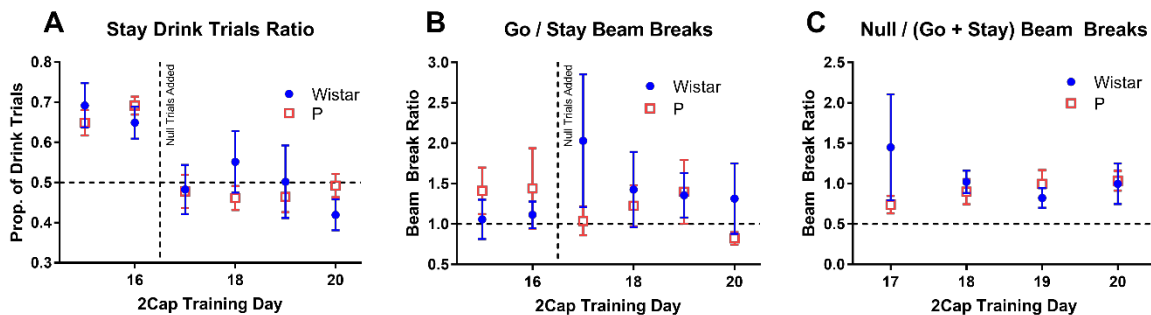

307  
308 **Figure 5: 2CAP training with null trials.** Starting on the 17<sup>th</sup> day of 2CAP training, 20 null trials replaced 10  
309 go and 10 stay trials in the 2CAP task. Null trials were identical to go and stay trials, except the directional  
310 tone was replaced by continued attention tone frequency and both sippers retracted after being briefly  
311 inserted. **(A)** At the end of regular training (days 15 and 16), about 65% of drink trials were stay trials for  
312 both P rats and Wistars, but following the introduction of null trials, drinking occurred on roughly balanced  
313 trial types for both strains. **(B)** Continuing the pattern from the first 16 days of training, adding null trials  
314 did not appear to increase movement to go trials relative to stay trials. **(C)** Both P rats and Wistars  
315 appeared to consistently move more on null trials than stay and go trials.

316  
317 Consumption during IAP and 2CAP were compared to examine if higher consumption animals in IAP also  
318 tended to have high consumptions in 2CAP (Figure 6). When data for both strains were fit with a linear  
319 regression, a significant positive slope was found, indicating that higher consumption in IAP tended to  
320 produce higher consumption in 2CAP (slope +/- SE: 0.072 +/- 0.022,  $R^2 = 0.44$ ,  $F(1,14) = 10.8$ ,  $p = 0.005$ ).  
321 However, the large difference in consumption between strains largely drove this effect. When only  
322 Wistars (slope +/- SE: 0.021 +/- 0.031,  $R^2 = 0.07$ ,  $F(1,6) = 0.43$ ,  $p = 0.54$ ) or only P rats (slope +/- SE: 0.006  
323 +/- 0.081,  $R^2 = 0.001$ ,  $F(1,6) = 0.005$ ,  $p = 0.95$ ) were examined, neither fit produced a significant slope.  
324 Furthermore, when the data were z-scored within each strain and combined (data not shown), the fit did  
325 not produce a significant slope (slope +/- SE: 0.144 +/- 0.264,  $R^2 = 0.021$ ,  $F(1,14) = 0.296$ ,  $p = 0.595$ ).  
326

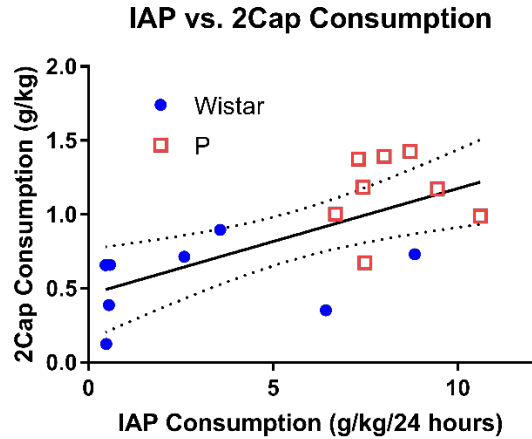

327  
328 **Figure 6: IAP and 2CAP consumption were correlated across all subjects.** IAP consumption averaged over  
329 last three sessions. 2CAP consumption averaged over last three sessions prior to null trials. Fit shown is  
330 for all subjects combined (dashed line: 95% confidence interval).  
331

### 332 Quinine Testing

333 Aversion resistant drinking was assessed by adulterating the standard 10% ethanol solution with 0.1 g/L  
334 quinine. Wistars significantly decreased intake, but P rats did not (main effect of day:  $F(1,14) = 10.743$ ,  $p$   
335  $= 0.006$ ; main effect of strain:  $F(1,14) = 20.9$ ,  $p = 0.0004$ ; interaction:  $F(1,14) = 10.15$ ,  $p = 0.007$ ) (Figure 7  
336 A). However, neither strain significantly reduced the proportion of access trials where the animal drank  
337 (i.e., had at least one lick) (main effect of day:  $F(1,14) = 2.06$ ,  $p = 0.17$ ; main effect of strain:  $F(1,14) = 0.72$ ,  
338  $p = 0.41$ ; interaction:  $F(1,14) = 1.9$ ,  $p = 0.19$ ) (Figure 7 B).

339  
340 To insure that the P rats could taste the 0.1 g/L quinine concentration in 10% ethanol, a three-bottle (two  
341 ethanol bottles, one water bottle) choice, home cage test was conducted (Figure 7 C). After three days of  
342 free access to 10% ethanol, the preferred bottle over all three days for each animal was adulterated with  
343 0.1 g/L. The preference ratio (preferred bottle consumption over total consumption) decreased for the  
344 quinine bottle for both Wistars and P rats (main effect of day:  $F(3,14) = 13.01$ ,  $p < 10^{-5}$ ; main effect of  
345 strain:  $F(1,14) = 3.58$ ,  $p = 0.08$ ; interaction:  $F(3,14) = 2.59$ ,  $p = 0.065$ ), indicating that P rats found the 0.1  
346 g/L quinine concentration used in 2CAP testing to be aversive.

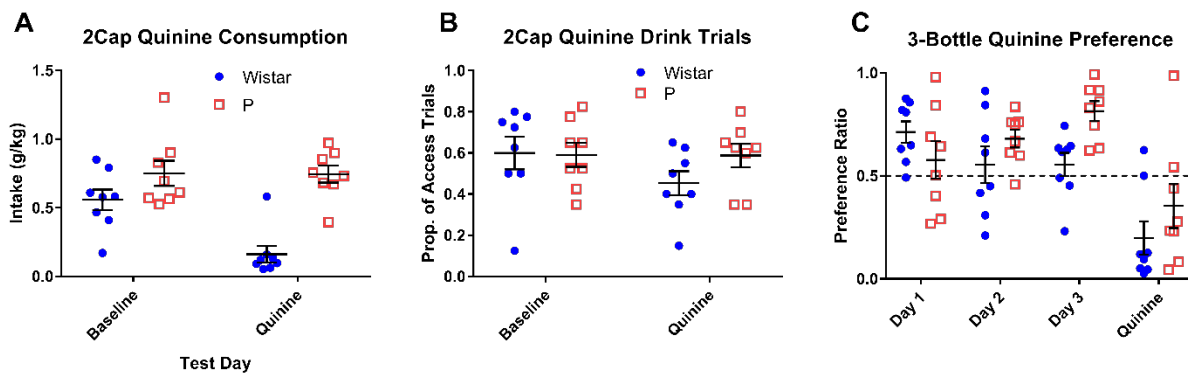

347  
348 **Figure 7: Quinine reduced drinking in Wistars, but not P rats. (A)** After adulterating the ethanol solution  
349 in 2CAP with 0.1 g/L quinine, Wistars showed a significant drop in intake, while P rats showed no change

350 in intake. **(B)** However, we observed only a small change in the number of drink trials (trials where the  
351 animal licked at least once) for Wistars, indicated that they continued to test the solution. **(C)** A 3-bottle  
352 choice test confirmed that the P rats could taste the quinine following adulteration with 0.1 g/L quinine  
353 in the preferred bottle. (Mean +/- SEM in all plots.)  
354

### 355 Reversal Testing

356 To assess the degree to which animals were using the cues to locate alcohol, a tone reversal test session  
357 was administered (Figure 8). In this session, the tones for the stay and go cues were reversed for each  
358 animal. However, when comparing several performance metrics to behavior during a regular 2CAP session  
359 the day before, no significant effects of day were observed. This result indicates that animals were not  
360 using the tone to locate alcohol.  
361

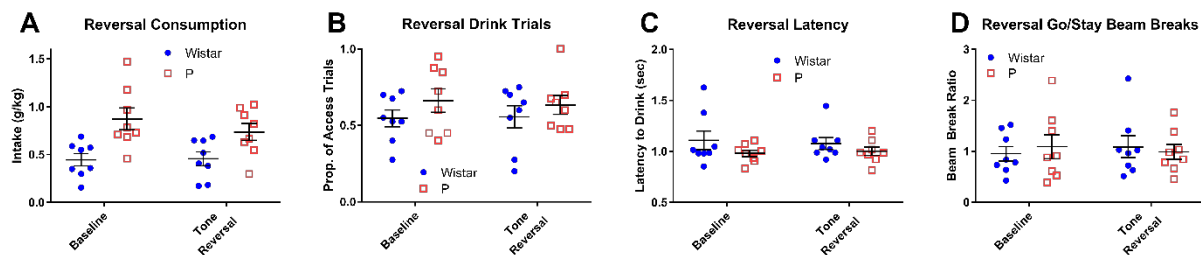

362 **Figure 8: Tone reversal testing indicated animals were not using tone frequencies to locate the correct**  
363 **sipper.** For both strains, consumption **(A)**, the proportion of access trials where the animal drank **(B)**, the  
364 latency to first lick **(C)**, and the ratio of beam breaks during go vs. stay cues **(D)** did not change when the  
365 frequency relationship between go and stay cues was reversed. (Mean +/- SEM in all plots.)  
366  
367

### 368 Free Access

369 During a free access session, animals were given uninterrupted access to 10% ethanol to assess motivation  
370 to consume 10% ethanol solution in the 2CAP setting (Figure 9). During the free access session, the sippers  
371 entered the chamber at the beginning and did not retract throughout the entire session (duration  
372 matched to regular 2CAP). In comparison to a regular 2CAP session on the previous day, animals  
373 consumed more alcohol during the free access session (main effect of day:  $F(1,14) = 55.45$ ,  $p < 10^{-5}$ ). In  
374 addition, P rats consumed more than Wistars (main effect of strain:  $F(1,14) = 11.69$ ,  $p = 0.004$ ) and an  
375 interaction between strain and day was observed ( $F(1,14) = 5.44$ ,  $p = 0.035$ ). This large increase in  
376 consumption in the free access session indicates that both P rats and Wistars are motivated to consume  
377 alcohol during the regular 2CAP task.  
378

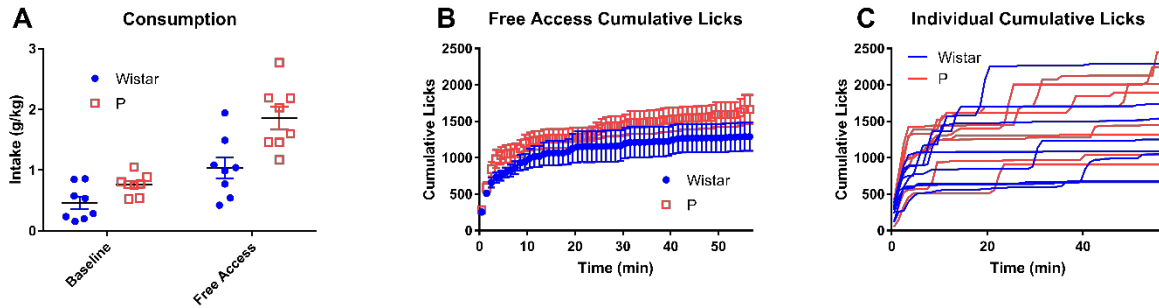

379  
380 **Figure 9: Free access testing indicated that animals were motivated to drink during standard 2CAP.** Free  
381 Access testing was performed by giving the animals free access to ethanol in their standard 2CAP test  
382 chambers for the same overall period of time as a standard 2CAP session. **(A)** Intake increased from  
383 standard 2CAP (baseline, one day earlier) to Free Access test. **(B)** Cumulative lick distributions for strains  
384 (mean +/- SEM) and **(C)** individual subjects showed that animals performed most of their consumption  
385 during the first few minutes of the session with subsequent drinking occurring in fairly discrete bouts.  
386

#### 387 BEC Data

388 Blood ethanol concentration (BEC) measurements were taken immediately following a regular 2CAP  
389 session (Figure 10 A) and a free access 2CAP session (Figure 10 B). A fit of the regular 2CAP intake vs. BEC  
390 for all animals found a significant slope (mean +/- SE: 80.7 +/- 33.2,  $F(1,14) = 5.92$ ,  $p = 0.029$ ) (Figure 10  
391 A). Similarly, a fit of the free access intake vs. BEC for all animals also found a significant slope (mean +/-  
392 SE: 44.7 +/- 8.1,  $F(1,14) = 30.3$ ,  $p < 10^{-4}$ ) (Figure 10 B). The relationships between intake and BEC for these  
393 two types of tasks were different due to differences in drinking patterns. The regular 2CAP required  
394 animals to spread drinking out throughout the task due to regular intervals of access during trials, whereas  
395 the free access session produced drinking patterns with large bouts clustered near the beginning of the  
396 session (Figure 9 B).

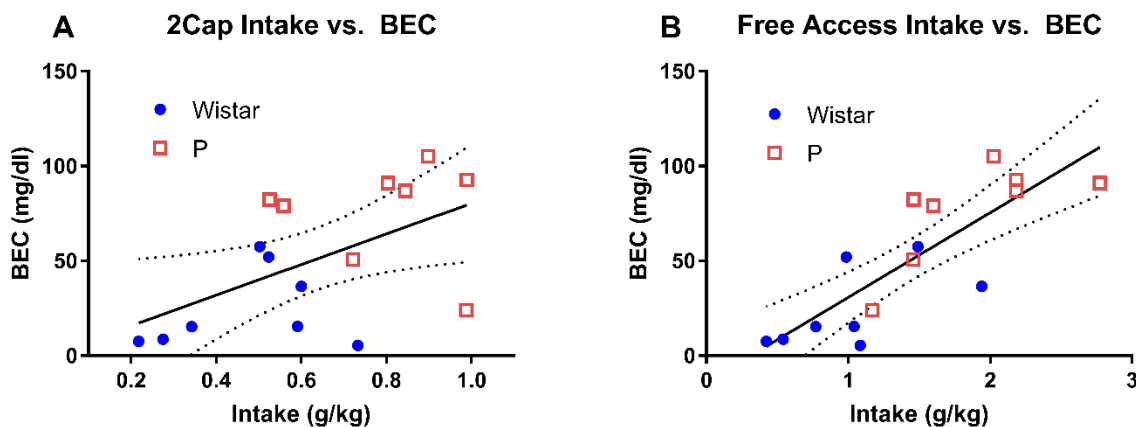

397  
398 **Figure 10: BEC results indicated that animals experienced the pharmacological effects of ethanol in both**  
399 **standard 2CAP and Free Access testing.** **(A)** Immediately following 2CAP, 2 Wistars (total: 8) and 7 P rats  
400 (total: 8) achieved BEC values greater than 40 mg/dl. **(B)** Immediately following Free Access testing, the  
401 same number of animals achieved BEC values greater than 40 mg/dl. During Free Access testing most

402 animals consumed the majority of the alcohol during the first few minutes of the session (i.e., roughly one  
403 hour prior to blood draw), whereas during standard 2CAP animals were forced to more evenly disperse  
404 consumption throughout the session. These differences in consumption pattern resulted in different  
405 intake vs. BEC relationships.  
406

## 407 Discussion

### 408 Aversion Resistant Drinking

409 We used quinine adulteration to assess aversion resistant drinking (Hopf et al., 2010) in alcohol preferring  
410 P rats and Wistars (see Quinine Testing). We found that P rats did not reduce intake when drinking quinine  
411 adulterated alcohol in the 2CAP task, but Wistars did reduce intake. Importantly, when given the option  
412 to drink quinine adulterated alcohol or non-adulterated alcohol in free access home cage drinking, these  
413 P rats preferred non-adulterated alcohol, indicating that they found this concentration of alcohol aversive.  
414 Also, though Wistars reduced intake in the 2CAP task with quinine adulterated alcohol, they did not  
415 reduce number of drink trials, indicating that they were motivated to consume alcohol in the 2CAP task.  
416 Overall, these results indicate that drinking by P rats in this task was inflexible and aversion resistant,  
417 whereas Wistars maintained control over drinking and were able to modify their drinking pattern based  
418 on the aversive stimuli.

419  
420 These results are important because they demonstrate that these two strains of rats can serve as models  
421 of aversion resistant, inflexible drinking and aversion sensitive, flexible drinking. In the future, we will  
422 investigate the cause of these differences between P rats and Wistars. Though we showed that P rats  
423 found this concentration of quinine aversive, perhaps it is only less aversive to P rats than Wistars. Indeed,  
424 several dose, strain, and species dependent effects have been observed with quinine adulteration as a  
425 model of aversion resistant drinking. For instance, other authors have shown that with enough drinking  
426 history and a lower dose of quinine, Wistar rats will exhibit aversion resistant drinking (Seif et al., 2013).  
427 Also, it has been shown that a single alcohol session with C57/BL6 mice produced aversion resistant  
428 drinking (Lei, Wegner, Yu, Simms, & Hopf, 2016). We would expect that there is some higher dose of  
429 quinine that would render P rats quinine sensitive, but we have not tested for such a dose. However,  
430 understanding why P rats are aversion resistant and Wistars are aversion sensitive is an important  
431 question because it mirrors the vital question of why some people continue to drink despite negative  
432 consequences, while others do not.

433  
434 The neurological differences underlying aversion-resistant drinking are only beginning to be understood.  
435 In a particularly important study, it was shown that connections from medial prefrontal cortex to ventral  
436 striatum are necessary for aversion-resistant drinking (Seif et al., 2013). Numerous molecular changes  
437 have been observed in amygdala following chronic-intermittent alcohol exposure (Hopf & Lesscher, 2014),  
438 including gene expression factors that regulate ARD (Lesscher, Houthuijzen, Groot Koerkamp, Holstege,  
439 & Vanderschuren, 2012). Finally, disruption of neural activity in insular cortex (insula) has been shown to  
440 reduce ARD (Chen & Lasek, 2018). Finally, recent behavioral evidence for a more automated “head down  
441 and push” strategy in aversion resistant consumption (Darevsky et al., 2018) indicates subtle behavioral  
442 differences in consumption that may be mediated by different neural circuits. In the future, we hope to  
443 investigate how aversion resistant and aversion sensitive drinking arise neurologically in P rats and Wistars  
444 in order to elucidate possible causes of aversion resistant drinking in humans.

445

## 446 Free Access Drinking

447 By examining the distribution lick times during free access drinking, we observed several important  
448 features of the animals' drinking patterns (see Free Access). First, both P rats and Wistars increased  
449 drinking in free access relative to regular 2CAP drinking. This indicates that the both strains were  
450 motivated to consume alcohol and were limited to less than their free access consumption levels in the  
451 2CAP task. Second, drinking in free access occurred primarily in the first few minutes of the session and in  
452 discrete bouts. Therefore, the animals tended to quickly drink to a certain threshold immediately  
453 following the beginning of alcohol access and then tended to drink only sporadically throughout the  
454 remainder of the session. As such, this task could provide a useful model to assess the neurobiological  
455 and behavioral processes that underlie front-loading and maintenance drinking.

456

## 457 2CAP Task

458 The audio 2CAP task used in this study was adopted from a previously published visual version of the 2CAP  
459 task (Linsenbardt & Lapish, 2015; Linsenbardt et al., 2018; McCane et al., 2014). However, in the current  
460 task, evidence for an association with the CS+ and a specific command was not detected (go vs. stay)  
461 (Figure 4 F) as animals did not change their behavior during the null CS (Figure 5 C).

462 There are at least two possible explanations for these results. First, it is possible that with further training,  
463 the animals would eventually learn the CS direction and to ignore the null CS. Previous research has shown  
464 that Wistar rats can differentiate between similar frequencies to those used in this task (Ono, Kudoh, &  
465 Shibuki, 2006), but perhaps these tones are not salient enough to generate a change in behavior in the  
466 training period tested. Second, it is possible that, given the large amount of access available to each animal  
467 without learning the CS direction association, the animals were not motivated to learn this association.  
468 Furthermore, because there was no cost to exploring for alcohol following the null CS, it is possible that  
469 the animals will never fully extinguish searching behavior during the null CS.

470

## 471 Genetic Risk

472 The data presented herein indicate that following about 8 weeks of alcohol exposure, P rats are resistant  
473 to quinine devaluation of alcohol drinking whereas Wistar rats are not. These data may indicate that  
474 genetic risk for excessive drinking accelerates the acquisition of quinine resistance. However, asymmetries  
475 in alcohol consumption history between P rats and Wistars complicate this interpretation. Future work  
476 will be required to clearly parse the influence of genetic risk and alcohol consumption history in quinine  
477 resistance.

478

## 479 Funding

480 This work was supported in part by NIH grant numbers: AA007462 (N.M.T.), AA022268 (D.N.L.), AA022268  
481 (D.N.L.), AA022821 (C.C.L.), AA023786 (C.C.L.), and AA007611 (C.C.L.). Funds from these grants paid  
482 publication costs.

## 483 References

484



- 485 1. Beckwith, S. W., & Czachowski, C. L. (2014). Increased delay discounting tracks with a high  
486 ethanol-seeking phenotype and subsequent ethanol seeking but not consumption. *Alcoholism,*  
487 *Clinical and Experimental Research*, *38*(10), 2607-2614. doi:10.1111/acer.12523
- 488 2. Beckwith, S. W., & Czachowski, C. L. (2016). Alcohol-preferring P rats exhibit elevated motor  
489 impulsivity concomitant with operant responding and self-administration of alcohol. *Alcoholism,*  
490 *Clinical and Experimental Research*, *40*(5), 1100-1110. doi:10.1111/acer.13044
- 491 3. Bell, R. L., Rodd, Z. A., Lumeng, L., Murphy, J. M., & McBride, W. J. (2006). The alcohol-preferring  
492 P rat and animal models of excessive alcohol drinking. *Addiction Biology*, *11*(3-4), 270-288.  
493 doi:10.1111/j.1369-1600.2005.00029.x
- 494 4. Chen, H., & Lasek, A. W. (2018). Perineuronal nets in the insula regulate aversion-resistant alcohol  
495 drinking. *bioRxiv*, 504571. doi:10.1101/504571
- 496 5. Darevsky, D., Gill, T. M., Vitale, K. R., Hu, B., Wegner, S. A., & Hopf, F. W. (2018). Drinking despite  
497 adversity: behavioral evidence for a head down and push strategy of conflict-resistant alcohol  
498 drinking in rats. *Addiction Biology*, *24*, 426-437. doi:10.1111/adb.12608
- 499 6. Edenberg, H. J., & Foroud, T. (2013). Genetics and alcoholism. *Nature Reviews Gastroenterology*  
500 *and Hepatology*, *10*(8), 487-494. doi:10.1038/nrgastro.2013.86
- 501 7. Engleman, E. A., Ingraham, C. M., McBride, W. J., Lumeng, L., & Murphy, J. M. (2006). Extracellular  
502 dopamine levels are lower in the medial prefrontal cortex of alcohol-preferring rats compared to  
503 Wistar rats. *Alcohol*, *38*(1), 5-12. doi:10.1016/j.alcohol.2006.03.001
- 504 8. Enoch, M. A. (2013). Genetic influences on the development of alcoholism. *Current Psychiatry*  
505 *Reports*, *15*(11). doi:10.1007/s11920-013-0412-1
- 506 9. Field, M., & Cox, W. M. (2008). Attentional bias in addictive behaviors: a review of its  
507 development, causes, and consequences. *Drug and Alcohol Dependence*, *97*(1-2), 1-20.  
508 doi:10.1016/j.drugalcdep.2008.03.030
- 509 10. Gilpin, N. W., Stewart, R. B., & Badia-Elder, N. E. (2008). Neuropeptide Y administration into the  
510 amygdala suppresses ethanol drinking in alcohol-preferring (P) rats following multiple  
511 deprivations. *Pharmacology, Biochemistry and Behavior*, *90*(3), 470-474.  
512 doi:10.1016/j.pbb.2008.04.005
- 513 11. Hopf, F. W., Chang, S. J., Sparta, D. R., Bowers, M. S., & Bonci, A. (2010). Motivation for alcohol  
514 becomes resistant to quinine adulteration after 3 to 4 months of intermittent alcohol self-  
515 administration. *Alcoholism, Clinical and Experimental Research*, *34*(9), 1565-1573.  
516 doi:10.1111/j.1530-0277.2010.01241.x
- 517 12. Hopf, F. W., & Lesscher, H. M. B. (2014). Rodent models for compulsive alcohol intake. *Alcohol*,  
518 *48*(3), 253-264. doi:10.1016/j.alcohol.2014.03.001
- 519 13. Kreuzsch, F., Vilenne, A., & Quertemont, E. (2013). Response inhibition toward alcohol-related cues  
520 using an alcohol go/no-go task in problem and non-problem drinkers. *Addictive Behaviors*, *38*(10),  
521 2520-2528. doi:10.1016/j.addbeh.2013.04.007
- 522 14. Lei, K., Wegner, S. A., Yu, J. H., Simms, J. A., & Hopf, F. W. (2016). A single alcohol drinking session  
523 is sufficient to enable subsequent aversion-resistant consumption in mice. *Alcohol*, *55*, 9-16.  
524 doi:10.1016/j.alcohol.2016.07.008
- 525 15. Lesscher, H. M. B., Houthuijzen, J. M., Groot Koerkamp, M. J., Holstege, F. C. P., & Vanderschuren,  
526 L. J. M. J. (2012). Amygdala 14-3-3ζ. *PLoS One*, *7*(5), e37999. doi:10.1371/journal.pone.0037999
- 527 16. Linsenbardt, D. N., & Lapish, C. C. (2015). Neural firing in the prefrontal cortex during alcohol  
528 intake in alcohol preferring 'P' vs. Wistar rats. *Alcoholism, Clinical and Experimental Research*,  
529 *39*(9), 1642-1653. doi:10.1111/acer.12804
- 530 17. Linsenbardt, D. N., Smoker, M. P., Janetsian-Fritz, S. S., & Lapish, C. C. (2016). Impulsivity in  
531 rodents with a genetic predisposition for excessive alcohol consumption is associated with a lack

- 532 of a prospective strategy. *Cognitive, Affective, & Behavioral Neuroscience*, *17*(2), 235–251.  
533 doi:10.3758/s13415-016-0475-7
- 534 18. Linsenbardt, D. N., Timme, N. M., & Lapish, C. C. (2018). Encoding of the intent to drink alcohol by  
535 the prefrontal cortex is blunted in rats with a family history of excessive drinking. *bioRxiv*.  
536 doi:10.1101/490664
- 537 19. McBride, W. J., Rodd, Z. A., Bell, R. L., Lumeng, L., & Li, T. K. (2014). The alcohol-preferring (P) and  
538 high-alcohol-drinking (HAD) rats - animal models of alcoholism. *Alcohol*, *48*, 209-215.  
539 doi:10.1016/j.alcohol.2013.09.044
- 540 20. McCane, A. M., Czachowski, C. L., & Lapish, C. C. (2014). Tolcapone suppresses ethanol intake in  
541 alcohol preferring rats performing a novel cued access protocol. *Alcoholism, Clinical and*  
542 *Experimental Research*, *38*(9), 2468-2478. doi:10.1111/acer.12515
- 543 21. Ono, K., Kudoh, M., & Shibuki, K. (2006). Roles of the auditory cortex in discrimination learning by  
544 rats. *European Journal of Neuroscience*, *33*(1-2), 1623-1632. doi:10.1016/S0378-5955(98)00162-  
545 2
- 546 22. Sanchis-Segura, C., & Spanagel, R. (2006). Behavioural assessment of drug reinforcement and  
547 addictive features in rodents: an overview. *Addiction Biology*, *11*(1), 2-38. doi:10.1111/j.1355-  
548 6215.2006.00012.x
- 549 23. Seif, T., Chang, S. J., Simms, J. A., Gibb, S. L., Dadgar, J., Chen, B. T., . . . Hopf, F. W. (2013). Cortical  
550 activation of accumbens hyperpolarization-active NMDARs mediates aversion-resistant alcohol  
551 intake. *Nature Neuroscience*, *16*(8), 1094-1100. doi:10.1038/nn.3445
- 552 24. Simms, J. A., Steensland, P., Medina, B., Abernathy, K. E., Chandler, L. J., Wise, R., & Bartlett, S. E.  
553 (2008). Intermittent access to 20% ethanol induces high ethanol consumption in Long-Evans and  
554 Wistar rats. *Alcoholism: Clinical and Experimental Research*, *32*(10), 1816-1823.  
555 doi:10.1111/j.1530-0277.2008.00753.x
- 556 25. Wiers, C. E., Stelzel, C., Park, S. Q., Gawron, C. K., Ludwig, V. U., Gutwinski, S., . . . Bermpohl, F.  
557 (2014). Neural correlates of alcohol-approach bias in alcohol addiction: the spirit is willing but the  
558 flesh is weak for spirits. *Neuropsychopharmacology*, *39*, 688-697. doi:10.1038/npp.2013.252
- 559 26. Zhou, Z., Karlsson, C., Liang, T., Xiong, W., Kimura, M., Tapocik, J. D., . . . Goldman, D. (2013). Loss  
560 of metabotropic glutamate receptor 2 escalates alcohol consumption. *PNAS*, *110*(42), 16963-  
561 16968. doi:10.1073/pnas.1309839110
